# Supplementary material for: Waterlogging Priming Enhances Hypoxia Stress Tolerance of Wheat Offspring Plants by Regulating Root Phenotypic and Physiological Adaption
Source: MDPI journal article supplement (doi:10.3390/plants11151969), 2022-07-28
Supplement: s1 [file s1]

## Supplementary figure

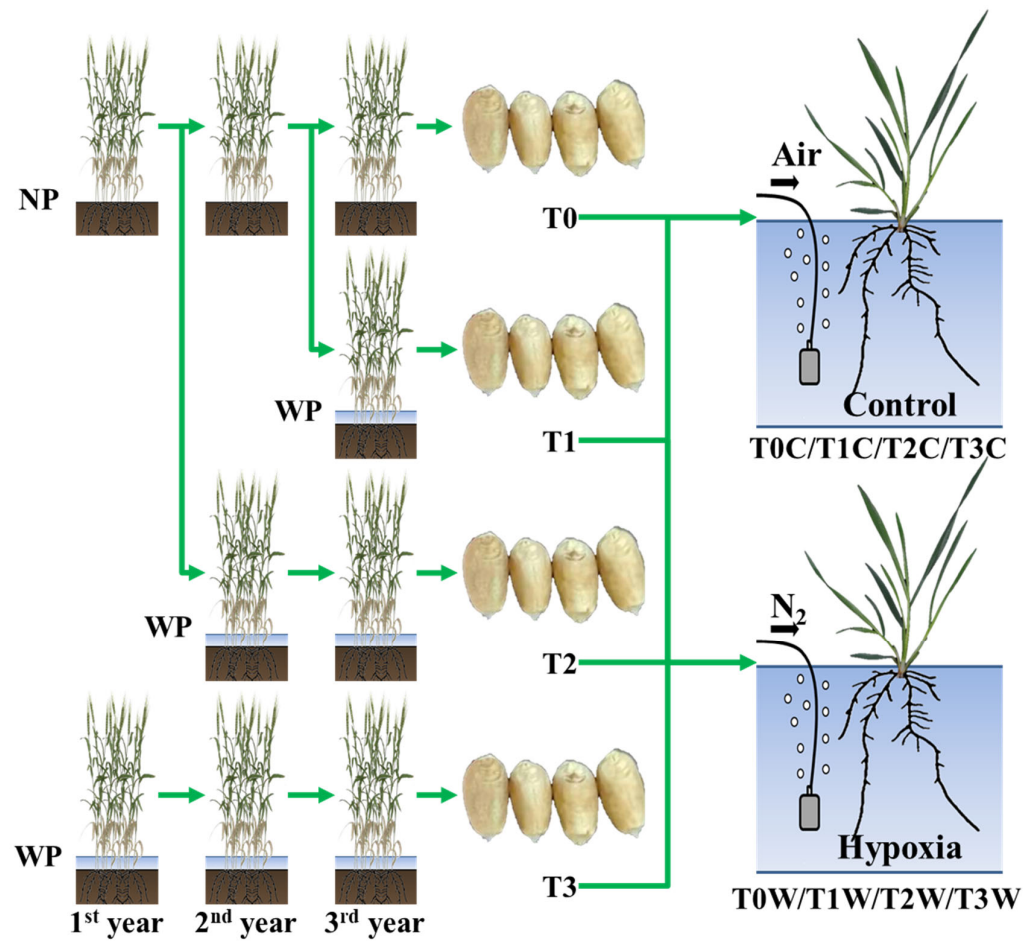

**Figure S1.** Waterlogging-priming pattern

Note: T0C, no-priming + no offspring hypoxia stress; T0W, no priming + offspring hypoxia stress; T1C, one-generation priming + no offspring hypoxia stress; T1W, one-generation priming + offspring hypoxia stress; T2C, two-generation priming + no offspring hypoxia stress; T2W, two-generation priming + offspring hypoxia stress; T3C, three-generation priming + no offspring hypoxia stress; T3W, three-generation priming + offspring hypoxia stress.

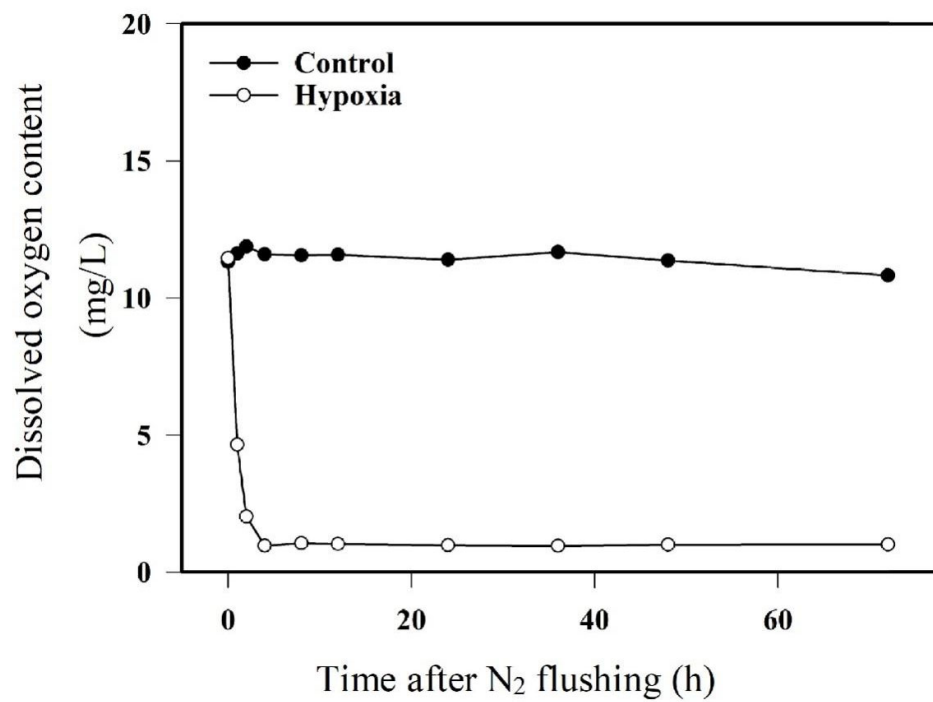

**Figure S2.** Dissolved oxygen content changes over time in solution with aeration of nitrogen

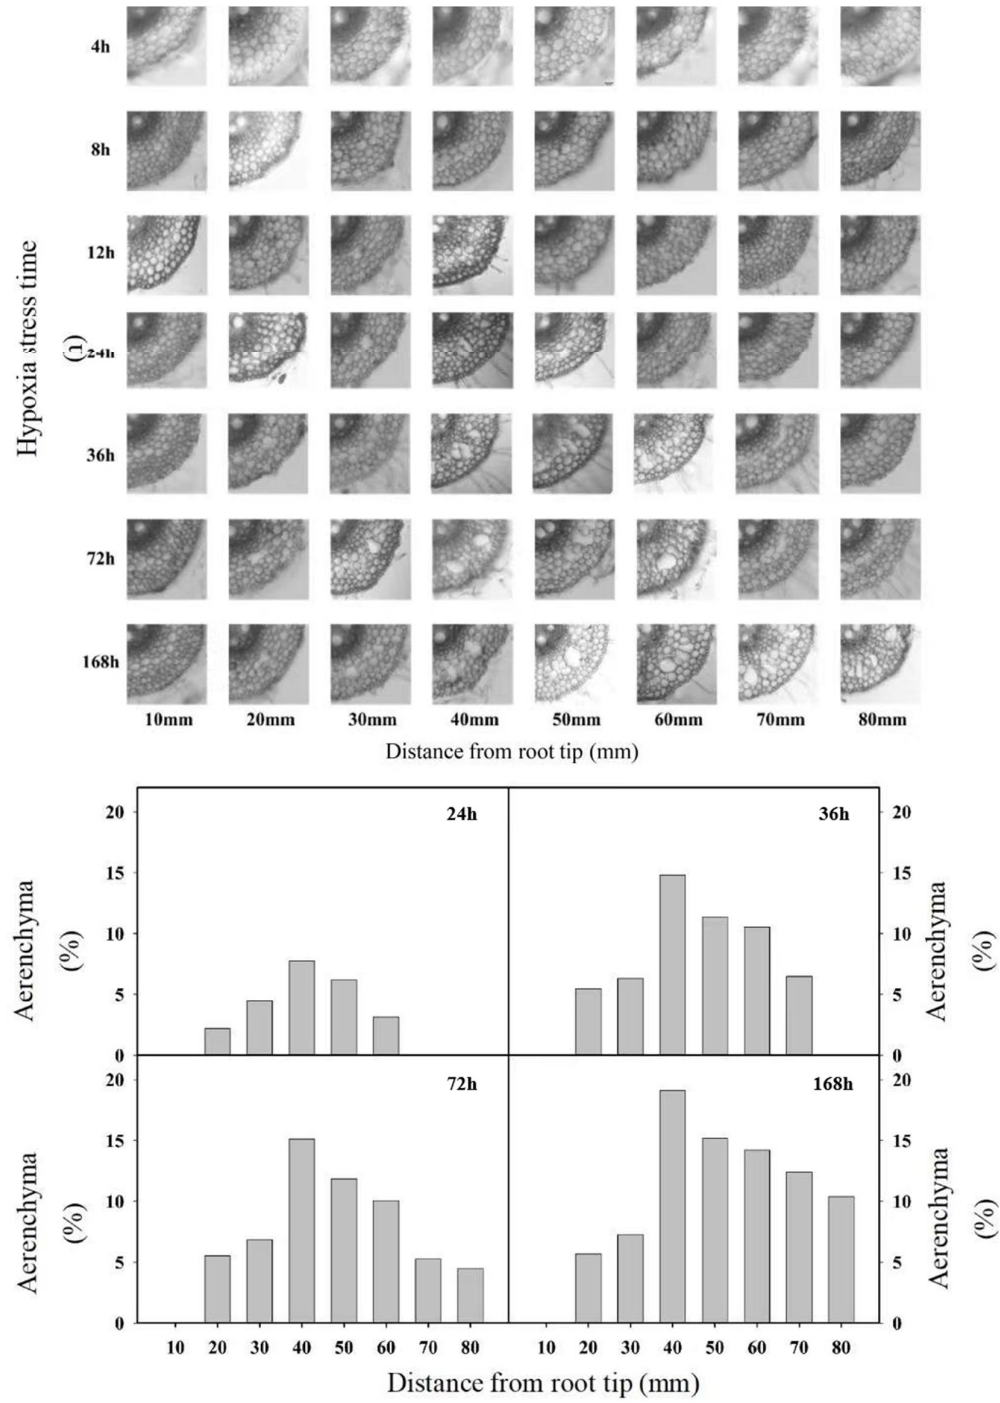

**Figure S3.** Effects of hypoxia stress on the formation of aerenchyma in wheat secondary roots

## Supplementary Tables

**Table S2.** PCR primers used for semi-quantitative and quantitative RT-PCR

| Gene          | Forward primer 5'-3'   | Reverse primer 5'-3'      | Citation |
|---------------|------------------------|---------------------------|----------|
| <i>TaAINV</i> | AACGTCACAAGGCTCGTCGT   | ATGTAGGCCTGATTGTAGGAGGAGT | [1]      |
| <i>TaNIN</i>  | CACTGGAGCGTAAGAGGTCATT | CCACACTATCAAAGCCGTCAT     | [1]      |
| <i>TaSuS</i>  | CCGACAAGGAGAAGTATG     | CGAGTTCCTAACATTAC         | [1]      |
| <i>TaPDC1</i> | AGGGTCTCTGCTGCCAAC     | TATTTGATGGCAACGTGCTG      | [2]      |
| <i>TaPDC2</i> | GAGCTTCTTGAGTGGGGTTCT  | ATGTGTCCTGGGGATTGG        | [2]      |
| <i>TaADH1</i> | CCCAATGTCGTGGAGATGTA   | CTAGTTCTCCATGCGGATGAT     | [2]      |
| <i>TaADH2</i> | GGAGCTGGACGTGGAGAA     | GAACGCCGTGTTGATCTG        | [2]      |
| <i>TaACS2</i> | AGCACCAGCAGCAGAAGG     | GTGGACGAGCGGAGACTG        | [2]      |
| <i>Actin</i>  | GCTCTCCAACAACATTGCCAA  | GCTTCTGCCTGTCACATACGC     | [3]      |

Note: *TaAINV*: Acid Invertase gene; *TaNIN*: Alkaline/neutral invertase gene; *TaSuS*: Sucrose synthase gene; *TaPDC1*, *TaPDC2*: Pyruvate decarboxylase gene; *TaADH1*, *TaADH2*: Alcohol dehydrogenase gene; *TaACS2*: 1-aminocyclopropane-1-carboxylate (ACC) synthase gene.

## References:

1. Liu, L.; Cang, J.; Yu, J.; Wang, X.; Huang, R.; Wang, J.; Lu, B. Effects of exogenous abscisic acid on carbohydrate metabolism and the expression levels of correlative key enzymes in winter wheat under low temperature. *Biosci Biotechnol Biochem* 2013, 77, 516-525, doi:10.1271/bbb.120752.
2. Yamauchi, T.; Watanabe, K.; Fukazawa, A.; Mori, H.; Abe, F.; Kawaguchi, K.; Oyanagi, A.; Nakazono, M. Ethylene and reactive oxygen species are involved in root aerenchyma formation and adaptation of wheat seedlings to oxygen-deficient conditions. *J Exp Bot* 2014, 65, 261-273, doi:10.1093/jxb/ert371.
3. Wang, X.; Zhang, X.; Chen, J.; Wang, X.; Cai, J.; Zhou, Q.; Dai, T.; Cao, W.; Jiang, D. Parental drought-priming enhances tolerance to post-anthesis drought in offspring of wheat. *Front Plant Sci* 2018, 9, 261, doi:10.3389/fpls.2018.00261.
